# Supplementary material for: Carbon-doped anatase titania nanoparticles: similarities and differences with respect to bulk and extended surface models
Source: Royal Society of Chemistry journal article supplement (doi:10.1039/d2cp02455a), 2022-01-01
Supplement: d2cp02455a1.pdf [file d2cp02455a1.pdf]

## **Carbon-doped anatase titania nanoparticles: similarities and differences with respect to bulk and extended surface models**

Elena R. Remesal, Ángel Morales-García\*

Departament de Ciència de Materials i Química Física & Institut de Química Teòrica i Computacional (IQTCUB),  
Universitat de Barcelona, c/ Martí i Franquès 1-11, 08028 Barcelona, Spain

e-mail: [angel.morales@ub.edu](mailto:angel.morales@ub.edu)

### **Contents**

Figures S1 to S3 shows to the sites where take place the doping at oxygen, titanium and interstitial sites, respectively.

Table S1 compiles the formation energy of C-doping at oxygen and titanium sites in the anatase bulk phase.

Table S2 compiles the formation energy of C-doping titania at oxygen, titanium and interstitial sites in the  $(\text{TiO}_2)_{84}$  NP.

Table S3 compiles the energy gap, and the energy orbitals LUMO (eV) and HOMO (eV) of carbon doping titania using PBE and PBE<sub>x</sub> density functionals.

**Fig. S1** Side and top views of the optimized  $(\text{TiO}_2)_{84}$  NPs C-doping at O sites ( $\text{C}_\text{O}$ ). Blue, red, and black spheres denote titanium, oxygen, and carbon, respectively. Note that C-atom have been represented with double radius to show clearly doping site.

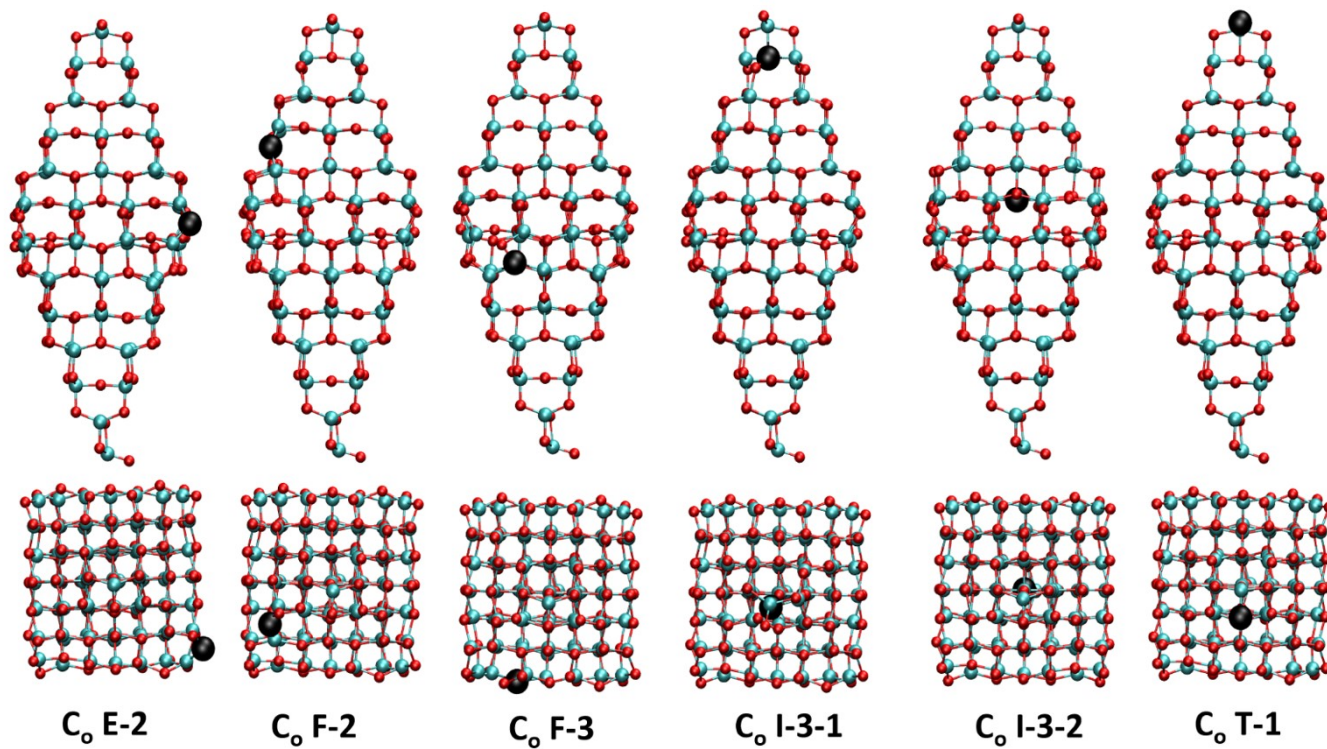

**Fig. S2** Side and top views of the optimized  $(\text{TiO}_2)_{84}$  NPs C-doping at Ti site ( $\text{C}_{\text{Ti}}$ ). Blue, red, and black spheres denote titanium, oxygen, and carbon, respectively. Note that C-atom have been represented with double radius to show clearly doping site.

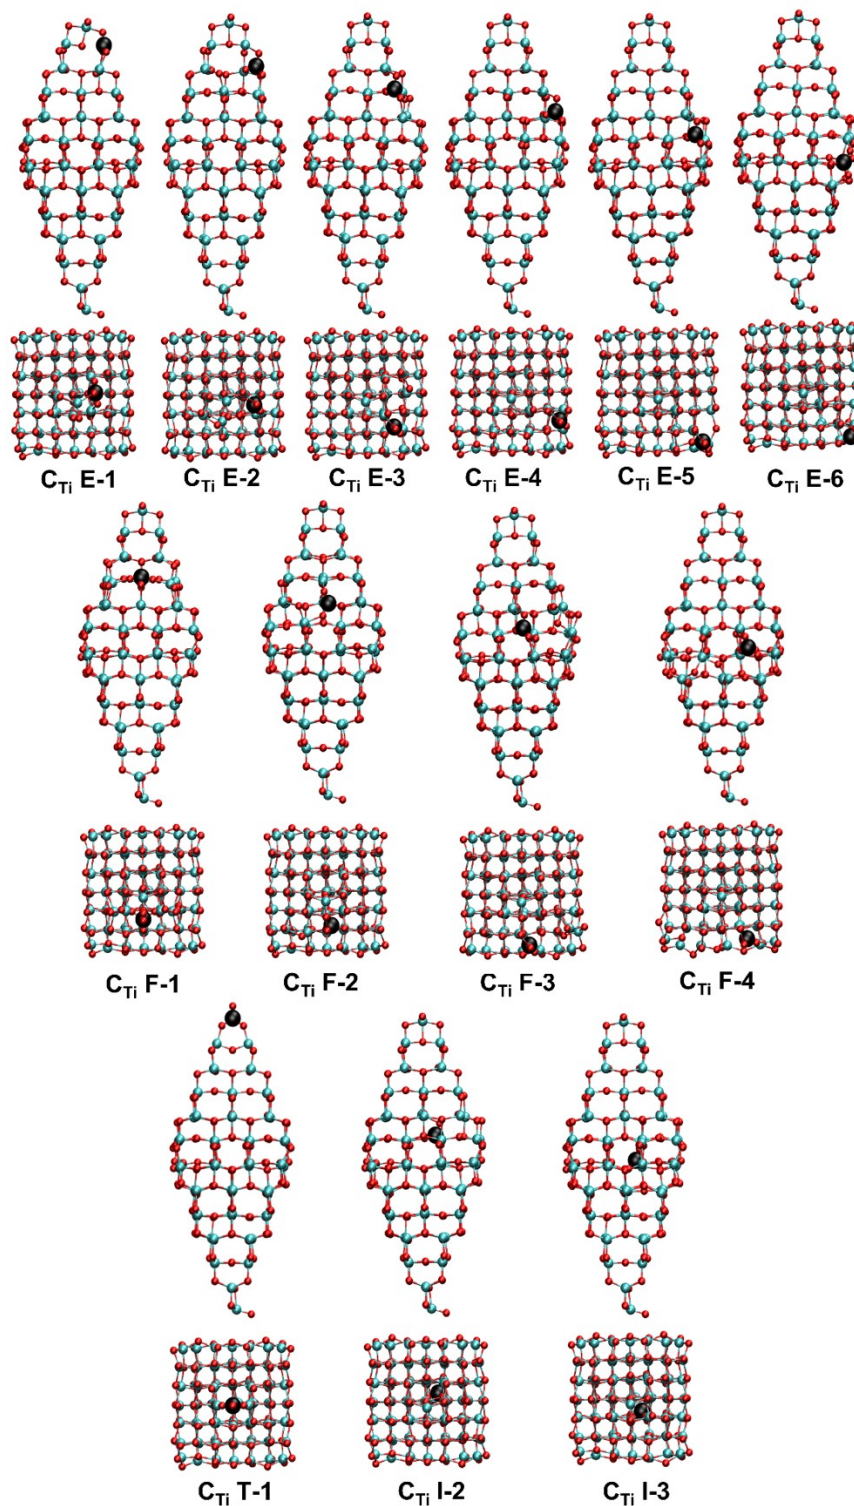

**Fig. S3** Side and top views of the different  $C_i$  doping  $(TiO_2)_{84}$  NPs. Blue, red, and black spheres denote titanium, oxygen, and carbon, respectively. Note that C-atom have been represented with double radius to show clearly doping site.

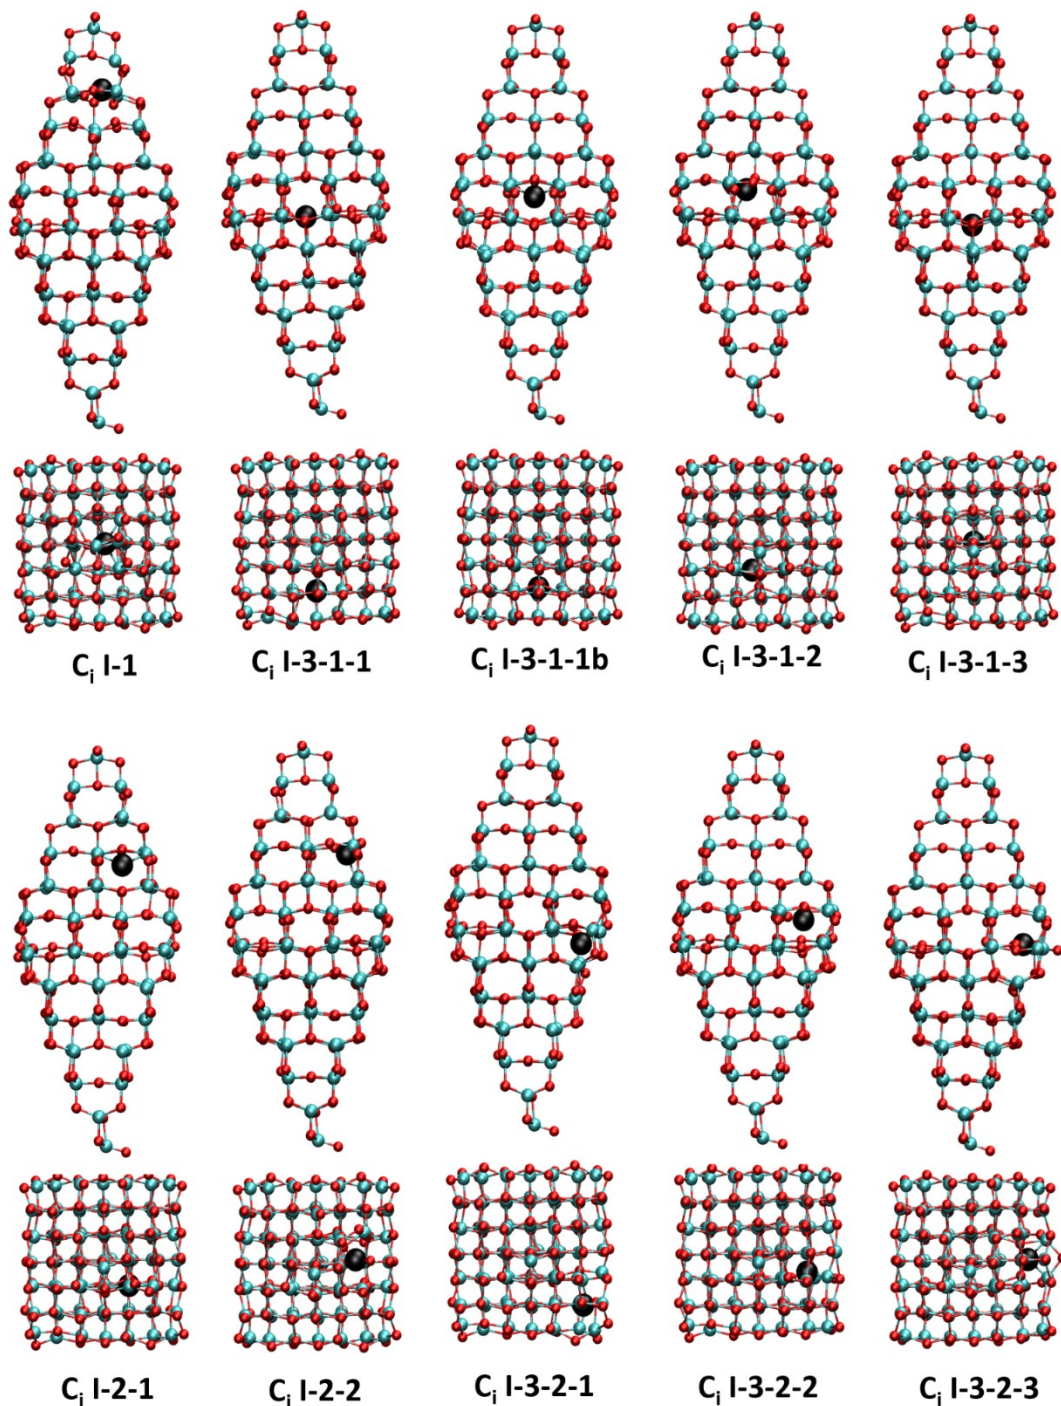

**Table S1.** Formation energy (in eV) of C-doped anatase bulk system as a function of the oxygen chemical potential (in eV). Formation of  $C_O$  and  $C_{Ti}$  are included considering the (1x1x1) and the (2x2x2) anatase supercells.

|                          | $\mu_O$ |       |       |       |       |
|--------------------------|---------|-------|-------|-------|-------|
|                          | -4      | -3    | -2    | -1    | 0     |
| 1x1x1 $C_O$ - $TiO_2$    | 8.38    | 9.38  | 10.38 | 11.38 | 12.38 |
| 1x1x1 $C_{Ti}$ - $TiO_2$ | 16.09   | 14.09 | 12.09 | 10.09 | 8.09  |
| 2x2x2 $C_O$ - $TiO_2$    | 8.50    | 9.50  | 10.50 | 11.50 | 12.50 |
| 2x2x2 $C_{Ti}$ - $TiO_2$ | 17.17   | 15.17 | 13.17 | 11.17 | 9.17  |

**Table S2.** Formation energy (in eV) of C-doped TiO<sub>2</sub> NPs as a function of the oxygen chemical potential (in eV).

| NP                      | $\mu_{\text{O}}$ |       |       |       |       |
|-------------------------|------------------|-------|-------|-------|-------|
|                         | -4               | -3    | -2    | -1    | 0     |
| C <sub>O</sub> E-2      | 7.41             | 8.41  | 9.41  | 10.41 | 11.41 |
| C <sub>O</sub> F-2      | 7.68             | 8.68  | 9.68  | 10.68 | 11.68 |
| C <sub>O</sub> F-3      | 7.70             | 8.70  | 9.70  | 10.70 | 11.70 |
| C <sub>O</sub> I-3-1    | 6.60             | 7.60  | 8.60  | 9.60  | 10.60 |
| C <sub>O</sub> I-3-2    | 8.42             | 9.42  | 10.42 | 11.42 | 12.42 |
| C <sub>O</sub> T-1      | 9.13             | 10.13 | 11.13 | 12.13 | 13.13 |
| C <sub>Ti</sub> T-1     | 12.40            | 10.40 | 8.40  | 6.40  | 4.40  |
| C <sub>Ti</sub> E-1     | 14.00            | 12.00 | 10.00 | 8.00  | 6.00  |
| C <sub>Ti</sub> E-2     | 12.73            | 10.73 | 8.73  | 6.73  | 4.73  |
| C <sub>Ti</sub> E-3     | 12.97            | 10.97 | 8.97  | 6.97  | 4.97  |
| C <sub>Ti</sub> E-4     | 13.29            | 11.29 | 9.29  | 7.29  | 5.29  |
| C <sub>Ti</sub> E-5     | 13.34            | 11.34 | 9.34  | 7.34  | 5.34  |
| C <sub>Ti</sub> E-6     | 14.61            | 12.61 | 10.61 | 8.61  | 6.61  |
| C <sub>Ti</sub> F-1     | 15.79            | 13.79 | 11.79 | 9.79  | 7.79  |
| C <sub>Ti</sub> F-2     | 14.78            | 12.78 | 10.78 | 8.78  | 6.78  |
| C <sub>Ti</sub> F-3     | 13.90            | 11.90 | 9.90  | 7.90  | 5.90  |
| C <sub>Ti</sub> F-4     | 13.69            | 11.69 | 9.69  | 7.69  | 5.69  |
| C <sub>Ti</sub> I-2     | 13.69            | 11.69 | 9.69  | 7.69  | 5.69  |
| C <sub>Ti</sub> I-3     | 14.85            | 12.85 | 10.85 | 8.85  | 6.85  |
| C <sub>I</sub> I-1      | -                | -     | -     | -     | 8.97  |
| C <sub>I</sub> I-2-1    | -                | -     | -     | -     | 9.31  |
| C <sub>I</sub> I-2-2    | -                | -     | -     | -     | 8.68  |
| C <sub>I</sub> I-3-1-1  | -                | -     | -     | -     | 8.75  |
| C <sub>I</sub> I-3-1-1B | -                | -     | -     | -     | 8.96  |
| C <sub>I</sub> I-3-1-2  | -                | -     | -     | -     | 8.25  |
| C <sub>I</sub> I-3-1-3  | -                | -     | -     | -     | 9.03  |
| C <sub>I</sub> I-3-2-1  | -                | -     | -     | -     | 8.37  |
| C <sub>I</sub> I-3-2-2  | -                | -     | -     | -     | 8.36  |
| C <sub>I</sub> I-3-2-3  | -                | -     | -     | -     | 8.34  |

**Table S3.** Energy gap, LUMO (eV) and HOMO (eV) of C-doped (TiO<sub>2</sub>)<sub>84</sub> NPs described with PBE and PBEx density functionals.

| NP                      | PBE  |       |       | PBEx |       |       |
|-------------------------|------|-------|-------|------|-------|-------|
|                         | Egap | LUMO  | HOMO  | Egap | LUMO  | HOMO  |
| C <sub>O</sub> E-2      | 0.47 | -4.89 | -5.36 | 1.14 | -4.62 | -5.76 |
| C <sub>O</sub> F-2      | 0.27 | -4.91 | -5.18 | 0.88 | -4.63 | -5.51 |
| C <sub>O</sub> F-3      | 0.74 | -4.90 | -5.65 | 1.53 | -4.62 | -6.15 |
| C <sub>O</sub> I-3-1    | 0.94 | -4.95 | -5.89 | 1.70 | -4.67 | -6.37 |
| C <sub>O</sub> I-3-2    | 0.67 | -5.58 | -6.25 | 1.13 | -5.78 | -6.92 |
| C <sub>O</sub> T-1      | 0.68 | -4.91 | -5.59 | 0.83 | -4.64 | -5.47 |
| C <sub>Ti</sub> T-1     | 2.07 | -4.94 | -7.01 | 3.16 | -4.65 | -7.81 |
| C <sub>Ti</sub> E-1     | 2.20 | -4.95 | -7.15 | -    | -     | -     |
| C <sub>Ti</sub> E-2     | 2.94 | -4.50 | -7.44 | 3.58 | -4.65 | -8.23 |
| C <sub>Ti</sub> E-3     | 2.53 | -4.90 | -7.42 | 3.61 | -4.60 | -8.21 |
| C <sub>Ti</sub> E-4     | 2.52 | -4.89 | -7.40 | -    | -     | -     |
| C <sub>Ti</sub> E-5     | 2.54 | -4.90 | -7.44 | -    | -     | -     |
| C <sub>Ti</sub> E-6     | 2.32 | -4.93 | -7.26 | -    | -     | -     |
| C <sub>Ti</sub> F-1     | 2.46 | -4.90 | -7.36 | -    | -     | -     |
| C <sub>Ti</sub> F-2     | 2.45 | -4.93 | -7.38 | -    | -     | -     |
| C <sub>Ti</sub> F-3     | 2.49 | -4.91 | -7.40 | -    | -     | -     |
| C <sub>Ti</sub> F-4     | 2.37 | -4.95 | -7.32 | -    | -     | -     |
| C <sub>Ti</sub> I-2     | 2.51 | -4.86 | -7.37 | -    | -     | -     |
| C <sub>Ti</sub> I-3     | 2.56 | -4.86 | -7.42 | -    | -     | -     |
| C <sub>i</sub> I-1      | 1.42 | -4.95 | -6.37 | -    | -     | -     |
| C <sub>i</sub> I-2-1    | 1.38 | -4.90 | -6.29 | -    | -     | -     |
| C <sub>i</sub> I-2-2    | 0.49 | -4.94 | -5.42 | -    | -     | -     |
| C <sub>i</sub> I-3-1-1  | 0.04 | -4.82 | -4.86 | -    | -     | -     |
| C <sub>i</sub> I-3-1-1b | 1.03 | -4.90 | -5.94 | -    | -     | -     |
| C <sub>i</sub> I-3-1-2  | 0.11 | -4.97 | -5.08 | 0.22 | -4.58 | -4.79 |
| C <sub>i</sub> I-3-1-3  | 0.05 | -4.81 | -4.85 | -    | -     | -     |
| C <sub>i</sub> I-3-2-1  | 1.33 | -4.91 | -6.24 | -    | -     | -     |
| C <sub>i</sub> I-3-2-2  | 0.08 | -4.81 | -4.89 | -    | -     | -     |
| C <sub>i</sub> I-3-2-3  | 0.25 | -4.91 | -5.16 | 0.92 | -4.63 | -5.55 |
